# Supplementary material for: Inherited mutations affecting the SRCAP complex are central in moderate-penetrance predisposition to uterine leiomyomas
Source: PubMed Central journal article supplement (PMC10027472; doi:10.1016/j.ajhg.2023.01.009), 2023-02-10
Supplement: mmc1.pdf [file mmc1.pdf]

**The American Journal of Human Genetics, Volume 110**

**Supplemental information**

**Inherited mutations affecting the SRCAP complex  
are central in moderate-penetrance  
predisposition to uterine leiomyomas**

**Niko Välimäki, Vilja Jokinen, Tatiana Cajuso, Heli Kuisma, Aurora Taira, Olivia Dagnaud, Sini Ilves, Jaana Kaukoomaa, Annukka Pasanen, Kimmo Palin, Oskari Heikinheimo, Ralf Bützow, Lauri A. Aaltonen, and Auli Karhu**

# SUPPLEMENTAL FIGURES

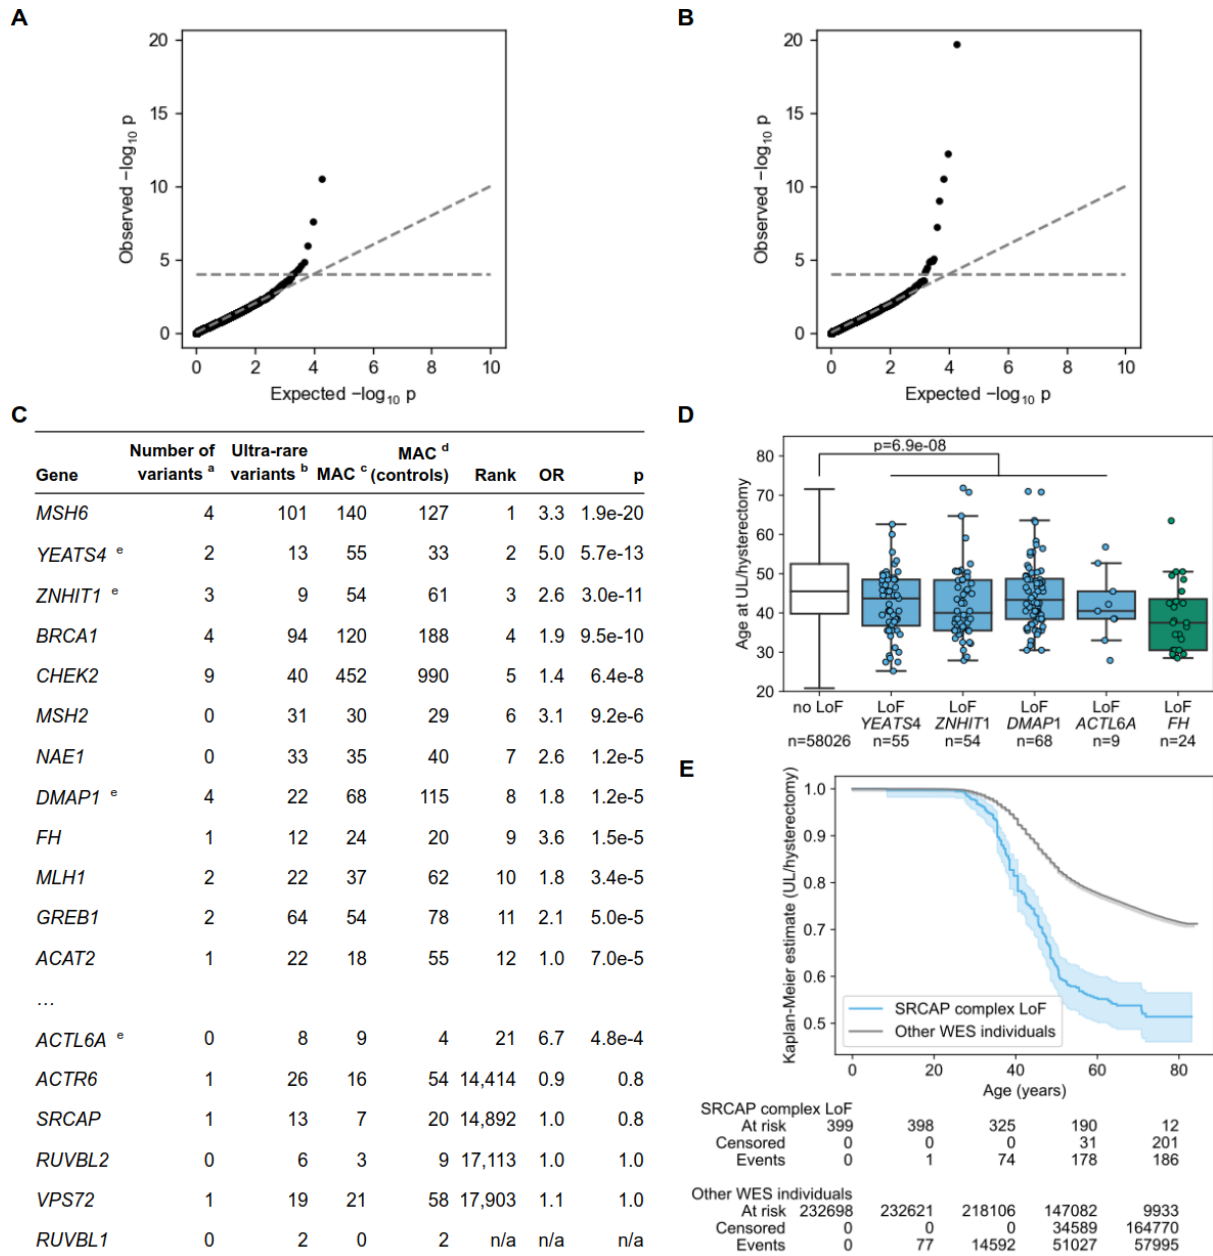

**Figure S1: Germline loss-of-function variant associations to individuals with uterine leiomyoma or hysterectomy operation.** A-B, quantile-quantile plots of SKAT-O test p values across all 18,899 genes: A, uterine leiomyoma (UL) phenotype, and B, the combined phenotype of UL or hysterectomy. The diagonal dashed line shows where the observed and expected null distributions match, and the horizontal dashed line shows  $p=1e-4$ . C-E, summary statistics for

58,709 individuals with UL or hysterectomy and 174,905 female controls. Genes that passed exome-wide significance at  $p < 1e-4$  are shown, including a summary of all nine SRCAP complex genes. The p values are from gene-based SKAT-O tests. Rank: rank among 18,899 genes; OR: odds ratio; MAC: minor allele count for loss-of-function (LoF) variants; <sup>a</sup> Number of LoF variants with minor allele frequency  $\leq 1\%$ , excluding ultra-rare variants; <sup>b</sup> Number of ultra-rare LoF variants with  $MAC \leq 10$ ; <sup>c</sup> MAC among individuals with UL/hysterectomy; <sup>d</sup> MAC among female controls; <sup>e</sup> SRCAP complex genes that passed  $p < 0.05/9$ ; n/a: no statistics were computed for  $MAC < 3$  genes. D-E, *YEATS4*, *ZNHIT1*, *DMAP1* and *ACTL6A* LoF variants contribute to younger age at UL diagnosis or hysterectomy ( $p = 6.9e-8$ ; two-sided Welch's t test). D, age at UL diagnosis or hysterectomy, stratified by the gene with a LoF variant. Box plots show the median and the first and third quartiles of the data; whiskers extend up to 1.5 interquartile range (IQR) and dots show the individual observations. *FH* is shown as a reference. No LoF: individuals without LoF variants among the genes highlighted. E, Kaplan-Meier estimates ( $p = 3.8e-31$ ; two-sided log-rank test) and at risk, censored and event counts for the five time points on the X-axis. Individuals with *FH* LoF variants were excluded from the Kaplan-Meier estimates.

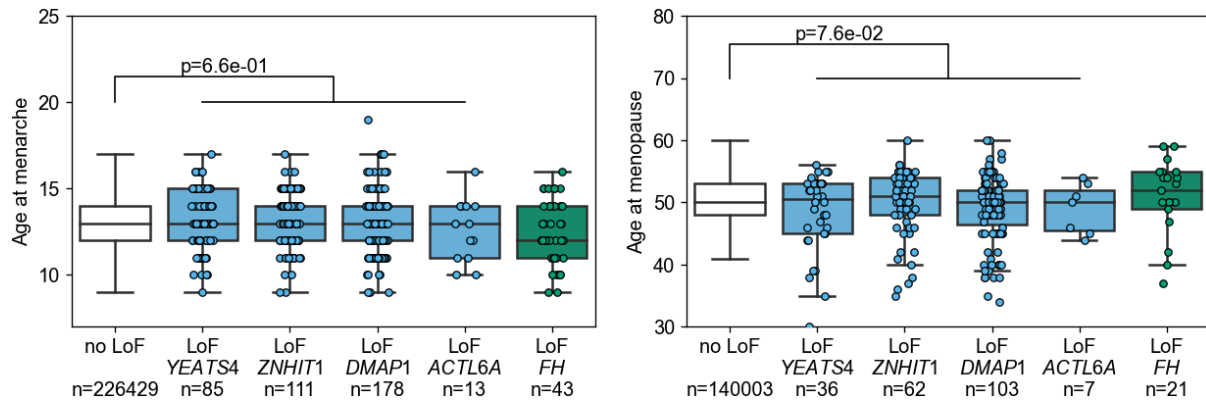

**Figure S2. No differences in age at menarche or menopause were observed for women with loss-of-function of SRCAP complex genes.** *YEATS4*, *ZNHIT1*, *DMAP1* and *ACTL6A* were examined for loss-of-function (LoF) variant association to age at menarche and menopause. Box plots stratified by the gene with a LoF variant, showing the median and the first and third quartiles of the data; whiskers extend up to 1.5 IQR. Coloured dots show the individual observations with LoF variants. *FH* is shown as a reference. On the left, age at menarche stratified by LoF status. No difference was observed ( $p=0.66$ ; two-sided Welch's t test). On the right, age at menopause stratified by the gene with a LoF variant. No difference was observed ( $p=0.076$ ; two-sided Welch's t test). Altogether 226,859 and 140,232 women had age at menarche and menopause information available, respectively. No LoF: women with no LoF variants among the genes highlighted.

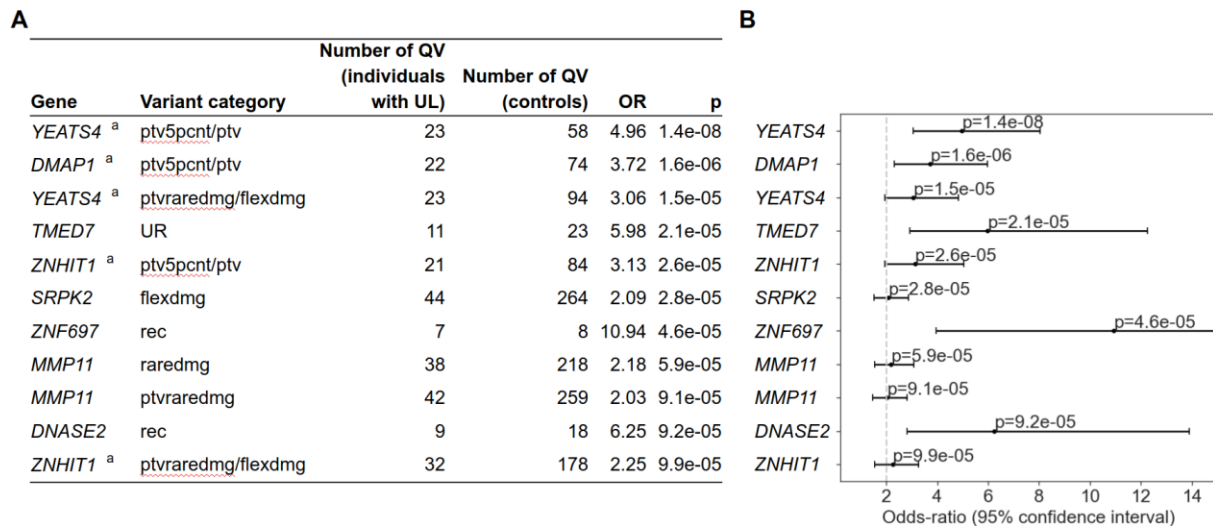

**Figure S3. Summary of moderate-penetrance associations to uterine leiomyoma.** A uterine leiomyoma endpoint comprising 15,780 individuals with ULs and 197,159 female controls was inspected for gene-level associations across ten different variant categories and 19,000 genes. Altogether eleven associations displayed a moderate effect size (gene-based collapsing test, odds-ratio [OR]>2.0 and p value<1e-4). A, details for numbers qualifying variants (QV), odds-ratios (OR) and p values (Fisher's exact test). ptv5pcnt/ptv: Protein-truncating variants (MAF≤5% had the same variants as MAF≤0.1%). ptvraredmg, flexdmg, raredmg: rare non-synonymous, predicted damaging variants (MAF≤0.025%, MAF≤0.1%, MAF≤0.025%, respectively). UR: ultra-rare damaging variants (MAF≤0.005%). rec: recessive variant model (MAF≤1%). <sup>a</sup> SRCAP complex member genes. B, odds ratios, p values and 95% confidence intervals. The dashed-line shows the OR>2.0 cutoff.

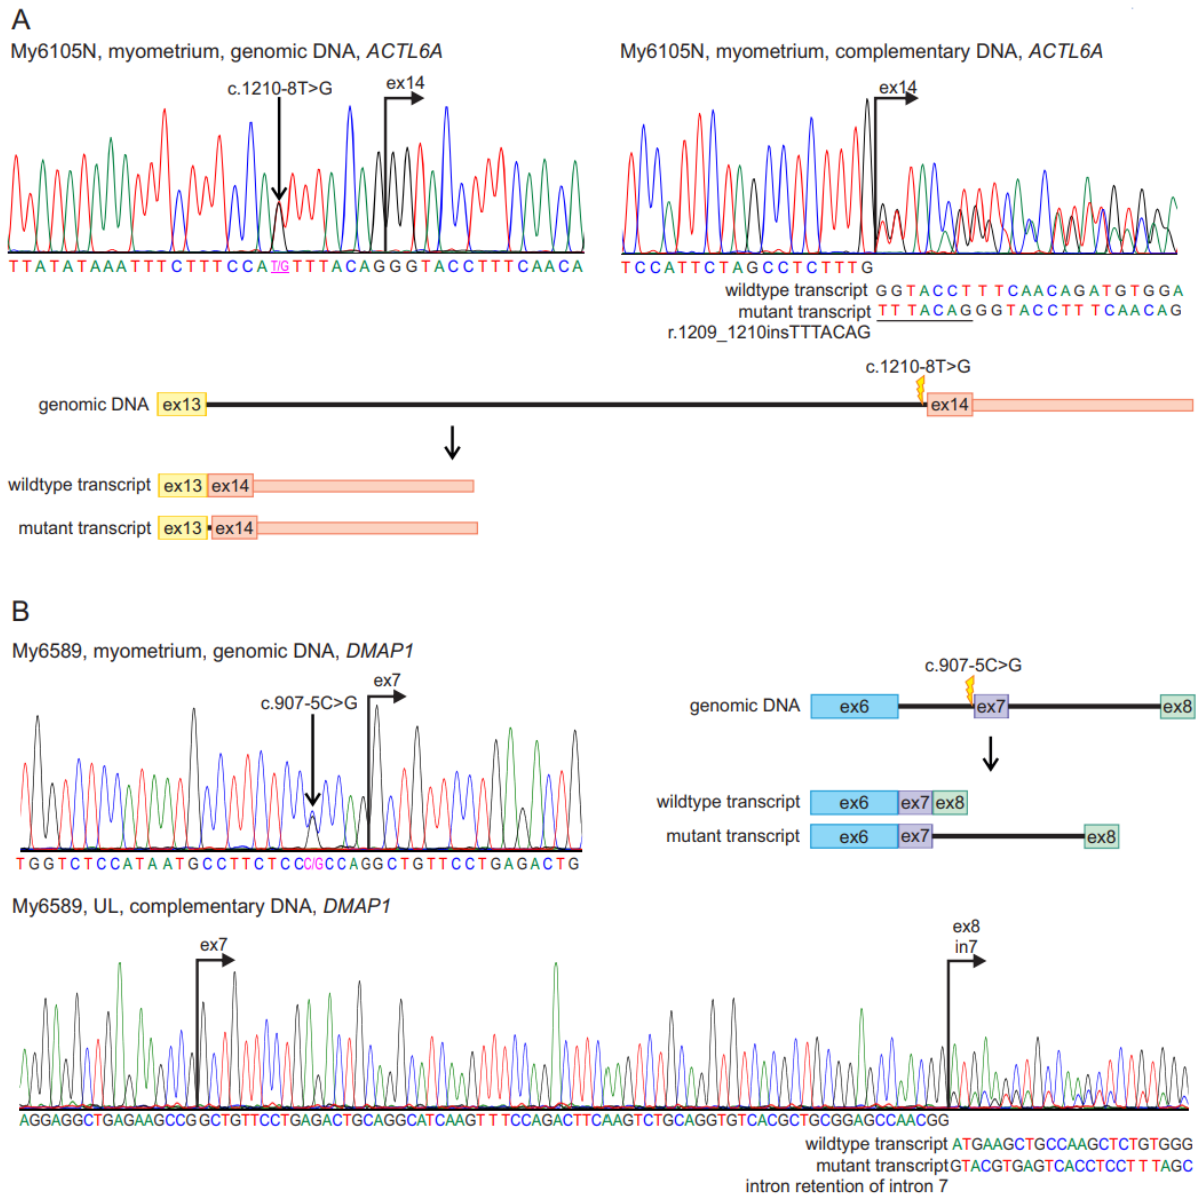

**Figure S4. Splice-site variants of SRCAP complex members in two individuals with ULs.**

A) Sanger sequencing of genomic DNA from normal myometrium confirmed that individual My6105 has an intronic germline variant c.1210-8T>G in *ACTL6A*. Sequencing of complementary DNA (cDNA) revealed that this mutation creates a new splice site, resulting in a 7bp insertion c.1209\_1210insTTTACAG at the transcript level, breaking the reading frame.

B) Individual My6589 harbored a germline mutation *DMAP1* c.907-5C>G. At the transcript level, cDNA sequencing revealed intron retention of intron 7.

# SUPPLEMENTAL TABLES

**Table S1. Primers used for the mutation screening.**

| Gene and exon(s)         | Primer sequences 5'-3'                             | Amplicon length |
|--------------------------|----------------------------------------------------|-----------------|
| <i>ACTL6A</i> exon 1     | GGCTATCGCTCCTCGAGAC<br>CGGTTACAAACCCACACG          | 172 bp          |
| <i>ACTL6A</i> exons 2-3  | TATTTGGAAGACTGAGGCGG<br>TGTCTGGAAATCAGTTTGTGG      | 680bp           |
| <i>ACTL6A</i> exon 4     | TTACATTTGGGACAGGTCTGG<br>CCATTAGGGTGTTTTGTTGTTC    | 560bp           |
| <i>ACTL6A</i> exon 5     | TGAGATATTATGAAAGATGATTCCC<br>GGAACAAGCAATAATTGGCG  | 345bp           |
| <i>ACTL6A</i> exon 6     | GAGCCTGCCCTTTACAATAAAC<br>TCAACACATAAATAAAGCCATGC  | 355bp           |
| <i>ACTL6A</i> exons 7-8  | TCACATAAATACCCACAGAGG<br>CCATATTTACTCAAGGATTACAGC  | 477bp           |
| <i>ACTL6A</i> exons 9-10 | AAACATGGTCCAATTTCAATCAG<br>CAAAACATTTTAGCCACAAAAGC | 550bp           |
| <i>ACTL6A</i> exon 11    | GTGGCTAAAATGTTTTGGATATG<br>ATGATTTGGGGACATTTCAAGTC | 221bp           |
| <i>ACTL6A</i> exon 12    | CCAGGATGGAGAATTGATGG<br>ACCAGGCACACACAAAATATC      | 382bp           |
| <i>ACTL6A</i> exon 13    | GCGAGGAAGACCCTGTCTC<br>AGGTCTTCCACTCATTTGACAG      | 318bp           |
| <i>ACTL6A</i> exon 14    | GGTTGTAAGCTACAATCACGCC<br>AAAGATGGTCATTCTTTTCCTG   | 302bp           |
| <i>DMAPI</i> exon 1      | TGAGCCTGGTCCTTCTTCAG<br>AGTGTAGCACCCATCCCTTG       | 261bp           |
| <i>DMAPI</i> exon 2      | GCTTTGTTCAGGGATTGAGC<br>AACTAGGAGTTAGGGGCATGG      | 247bp           |
| <i>DMAPI</i> exon 3      | AGGGTAGGGTAGATCAGCTCC<br>AGCTCGCACAAATGGCTC        | 350bp           |
| <i>DMAPI</i> exons 4-5   | GTCAGTGGGGCCTGGAG<br>AGTGGGAGTTGAGGGGATG           | 602bp           |
| <i>DMAPI</i> exons 6-7   | TCACCTCCGTGTCTACCCTC<br>CTGCTCCATCCCCACCTG         | 582bp           |
| <i>DMAPI</i> exon 8      | TTCCACCATCTTCCCTCTG<br>CCTGCCAACCTATATCCAC         | 226bp           |
| <i>DMAPI</i> exon 9      | GAGGGGAGTTCACATTGCTG<br>CACTAGAGGGAGAGGAGCCC       | 451bp           |
| <i>DMAPI</i> exon 10     | TGAAGCACATGCACTAAGCC<br>GAAAGGAAAAGGAAGCAGCC       | 210bp           |
| <i>YEATS4</i> exon 1     | CCAAGTAACTCGCCCTCCTT<br>GAGAAAAGGCGCGAAAGGAA       | 291bp           |

|                         |                                                  |       |
|-------------------------|--------------------------------------------------|-------|
| <i>YEATS4</i> exon 2    | AGCCTGCCATTCTTTAAAGCA<br>ACAGGTTGTCTTTAAGCAAAACA | 290bp |
| <i>YEATS4</i> exons 3-4 | ACTTCCCAGGTGTAGTTCATGT<br>AGGATTTTGAAAGGCGCTACA  | 581bp |
| <i>YEATS4</i> exons 5-6 | TGGGTGATTTGCTGCAATAAGT<br>GGCACGAATCATAACAACCT   | 496bp |
| <i>YEATS4</i> exons 7   | CATTGTCGTCAGGAAATGCC<br>CCATTTCTCCAGTGAAGCCC     | 328bp |
| <i>ZNHIT1</i> exon 1    | ACGCGCAGAAGTACAAGCTA<br>GCGAAAGAGCGAGACCAAAA     | 220bp |
| <i>ZNHIT1</i> exon 2    | TGGGGATGAGATCAGAGAGC<br>GTCCTCCCACAGCCTGAGT      | 373bp |
| <i>ZNHIT1</i> exon 3    | TGAACCAGAGAAAGCTGCTG<br>GCCGGCTCTAGAACTCCTC      | 246bp |
| <i>ZNHIT1</i> exon 4    | GTTGGAGGAGCAGGTGAGAG<br>AGGATGAGGGGAGAGAGGTC     | 373bp |
| <i>ZNHIT1</i> exon 5    | CTGTCTGTGGCTTCCCATCC<br>CAGAATCTCTCGCGATCAGGG    | 585bp |

---

**Primers to validate splice effect of the *ACTL6A* c.1210-8T>G germline mutation**

---

|                                    |                         |                                 |
|------------------------------------|-------------------------|---------------------------------|
| Forward primer aligning to exon 12 | GCAGTGTAATAGTGGCAGGAG   | wildtype 336bp<br>mutated 343bp |
| Reverse primer aligning to exon 14 | AGATGGTCATTCTTTTCCTGAGT |                                 |

---

**Primers to validate splice effect of the *DMAPI* c.907-5C>G germline mutation**

---

|                                   |                      |                                 |
|-----------------------------------|----------------------|---------------------------------|
| Forward primer aligning to exon 5 | GCTTGAGCGTCTCTACAACC | wildtype 342bp<br>mutated 670bp |
| Reverse primer aligning to exon 8 | TGTTCCAGGGCCTTGATCTT |                                 |

---



**Table S2. *MSH6* and *BRCA1* hysterectomy associations arose with endometrial and ovarian cancer.** Summary numbers of individuals with loss-of-function (LoF) variants stratified by hysterectomy and cancer endpoints. Among individuals with *MSH6* and *BRCA1* LoF germline mutations, hysterectomy operations were explained to a large degree by endometrial and ovarian cancer, respectively. Breast cancer and *CHEK2* are shown for reference. Odds ratios (OR) and p values are from a two-sided Fisher's exact test.

| Gene         | Phenotype                                    | No hysterectomy |                         | Hysterectomy operation |                         | OR               | p       |
|--------------|----------------------------------------------|-----------------|-------------------------|------------------------|-------------------------|------------------|---------|
|              |                                              | No cancer       | Individuals with cancer | No cancer              | Individuals with cancer |                  |         |
| <i>MSH6</i>  | Breast cancer                                | 114             | 13                      | 126                    | 13                      | 0.9              | 8.4E-01 |
| <i>MSH6</i>  | Endometrial cancer                           | 127             | 0                       | 89                     | 50                      | n/a <sup>a</sup> | 6.0E-17 |
| <i>MSH6</i>  | Ovarian cancer                               | 127             | 0                       | 125                    | 14                      | n/a <sup>a</sup> | 1.0E-04 |
| <i>MSH6</i>  | Malignant neoplasms of female genital organs | 123             | 4                       | 71                     | 68                      | 29.5             | 3.7E-19 |
| <i>BRCA1</i> | Breast cancer                                | 133             | 55                      | 69                     | 51                      | 1.8              | 2.0E-02 |
| <i>BRCA1</i> | Endometrial cancer                           | 185             | 3                       | 113                    | 7                       | 3.8              | 5.1E-02 |
| <i>BRCA1</i> | Ovarian cancer                               | 184             | 4                       | 91                     | 29                      | 14.7             | 1.2E-09 |
| <i>BRCA1</i> | Malignant neoplasms of female genital organs | 178             | 10                      | 79                     | 41                      | 9.2              | 6.9E-11 |
| <i>CHEK2</i> | Breast cancer                                | 826             | 160                     | 356                    | 93                      | 1.3              | 4.4E-02 |
| <i>CHEK2</i> | Endometrial cancer                           | 985             | 1                       | 427                    | 22                      | 50.7             | 9.0E-11 |
| <i>CHEK2</i> | Ovarian cancer                               | 982             | 4                       | 430                    | 19                      | 10.8             | 4.5E-07 |
| <i>CHEK2</i> | Malignant neoplasms of female genital organs | 948             | 38                      | 395                    | 54                      | 3.4              | 2.1E-08 |

<sup>a</sup> n/a: no odds ratio estimates available.

**Table S3. Phenome-wide associations of loss-of-function variants in SRCAP complex genes.** The nine SRCAP complex genes were tested for loss-of-function (LoF) variant associations against 15,500 binary phenotypes. A putative significance threshold was chosen at  $p < 0.0005$  to account for multiple testing over the nine SRCAP complex genes and 15,500 binary phenotypes. The table gives summary statistics for a gene-based collapsing test, including the gene symbol, phenotype, variant model (details in Material and methods), category of the phenotype, p value (two-sided Fisher's exact test; details in Material and methods) and numbers of individuals with the phenotype and numbers of controls. Numbers of qualifying variant (QV) are also given. OR: odds ratio; LCI and UCI: lower and upper 95% confidence intervals, respectively.

**Table S3 is provided as a separate Excel file.**

**Table S4. Results of H2A.Z prescreening IHC.** Uterine leiomyoma (UL) sections were stained together with the *YEATS4* and *MED12* mutated ULs used as negative and positive controls, respectively. Samples were classified based on the immunoreaction intensity into three groups: 0 = negative or weak, 1 = moderate, 2= strong.

| <b>Individual ID</b> | <b>Tumor</b> | <b>H2A.Z score</b> |
|----------------------|--------------|--------------------|
| <b>My6451</b>        | My6451m1     | 2                  |
| <b>My6458</b>        | My6458m1     | 1                  |
| <b>My6463</b>        | My6463m1     | 1                  |
|                      | My6463m2     | 2                  |
| <b>My6499</b>        | My6499m1     | 2                  |
| <b>My6512</b>        | My6512m1     | 2                  |
| <b>My6517</b>        | My6517m1     | 2                  |
| <b>My6519</b>        | My6519m1     | 2                  |
| <b>My6527</b>        | My6527m1     | 2                  |
| <b>My6533</b>        | My6533m1     | 2                  |
| <b>My6542</b>        | My6542m1     | 2                  |
| <b>My6544</b>        | My6544m1     | 2                  |
| <b>My6547</b>        | My6547m1     | 2                  |
| <b>My6564</b>        | My6564m1     | 1                  |
| <b>My6569</b>        | My6569m1     | 2                  |
| <b>My6571</b>        | My6571m1     | 2                  |
| <b>My6576</b>        | My6576m1     | 2                  |
| <b>My6589</b>        | My6589m1     | 1                  |
| <b>My6593</b>        | My6593m1     | 2                  |
| <b>My6601</b>        | My6601m1     | 2                  |
| <b>My6604</b>        | My6604m1     | 2                  |
| <b>My6605</b>        | My6605m1     | 2                  |
|                      | My6605m2     | 0                  |
|                      | My6605m3     | 2                  |
| <b>My6615</b>        | My6615m1     | 2                  |
| <b>My6621</b>        | My6621m1     | 1                  |
| <b>My6623</b>        | My6623m1     | 2                  |
| <b>My6624</b>        | My6624m1     | 2                  |

|               |          |   |
|---------------|----------|---|
| <b>My6626</b> | My6626m1 | 2 |
| <b>My6634</b> | My6634m3 | 2 |
| <b>My6635</b> | My6635m5 | 2 |
| <b>My6636</b> | My6636m1 | 2 |
| <b>My6638</b> | My6638m1 | 1 |
|               | My6638m2 | 1 |
|               | My6638m3 | 0 |
| <b>My6640</b> | My6640m1 | 2 |
| <b>My6644</b> | My6644m1 | 2 |
| <b>My6645</b> | My6645m2 | 2 |
|               | My6645m6 | 2 |
| <b>My6652</b> | My6652m2 | 2 |
| <b>My6655</b> | My6655m1 | 2 |
| <b>My6660</b> | My6660m1 | 1 |
| <b>My6661</b> | My6661m1 | 1 |
| <b>My6665</b> | My6665m1 | 1 |
| <b>My6667</b> | My6667m3 | 2 |
| <b>My6668</b> | My6668m1 | 2 |
|               | My6668m4 | 2 |
| <b>My6673</b> | My6673m3 | 2 |
| <b>My6674</b> | My6674m1 | 2 |
| <b>My6675</b> | My6675m4 | 2 |
|               | My6675m7 | 0 |
| <b>My6676</b> | My6676m4 | 2 |
| <b>My6677</b> | My6677m1 | 0 |
| <b>My6679</b> | My6679m4 | 2 |
| <b>My6680</b> | My6680m1 | 2 |
| <b>My6687</b> | My6687m1 | 2 |
| <b>My6692</b> | My6692m1 | 2 |
| <b>My6696</b> | My6696m1 | 1 |
| <b>My6701</b> | My6701m1 | 0 |

---

**Table S5. Reduction of H2A.Z levels in germline mutated *ACTL6A*, *YEATS4*, and *DMAPI***

**ULs.** Individual My6105 had a germline *ACTL6A* mutation, and individuals My6564 and My6606 shared a germline mutation in *YEATS4*. Four individuals (My6638, My6589, My6621, My6660) harbored *DMAPI* germline mutations. Samples are classified based on the immunoreaction intensity into three groups: 0 = negative/weak, 1 = moderate, 2= strong.

| <b>Individual ID</b>       | <b>Tumor</b> | <b>H2A.Z score</b> |
|----------------------------|--------------|--------------------|
| <b>My6105</b>              | My6105m1     | 0                  |
|                            | My6105m4     | 0                  |
|                            | My6105m5     | 0                  |
| <b>My6564</b>              | My6564m1     | 1                  |
| <b>My6606</b> <sup>a</sup> | MH19-A       | 1                  |
|                            | MH19-B       | 1                  |
|                            | MH19-C       | 0                  |
|                            | MH19-D       | 0                  |
|                            | MH19-E       | 0                  |
|                            | MH19-F       | 0                  |
|                            | MH19-H       | 0                  |
|                            | MH19-I       | 1                  |
|                            | MH19-K       | 0                  |
|                            | MH19-L       | 0                  |
|                            | MH19-M       | 0                  |
| <b>My6589</b>              | My6589m1     | 1                  |
| <b>My6621</b>              | My6621m1     | 1                  |
| <b>My6638</b>              | My6638m1     | 1                  |
|                            | My6638m2     | 1                  |
|                            | My6638m3     | 0                  |
| <b>My6660</b>              | My6660m1     | 1                  |

<sup>a</sup> formalin fixed paraffin embedded blocks of this individual from diagnostic laboratory
